# Supplementary material
Source: Springer Nature journal article supplement (https://www.springermedizin.de/resource/supplementary/13054_2011_515_MOESM1_ESM.pdf/9708712)
Supplement: MOESM1 [file 9708712]

# Trial flow

## Enrollment

Assessed for eligibility (n=260)

Excluded (n= 132)  
Not meeting inclusion criteria (n=120)  
Declined to participate (n=8)  
Other reasons (n=4)

Randomized (n=128)

## Allocation

Allocated to intervention (n=75)  
Did not received allocated intervention  
(residual gastric volume greater than 500 ml/24 h) (n=21:  
abdominal surgery =11, neurosurgery =2, trauma =8)

Allocated to control group (n=53)

Received allocated intervention (n=53)

## Follow-Up

Lost to follow-up (ICU stay < 48 hours) (n=5)  
Discontinued intervention (n=0)

Lost to follow-up (ICU stay < 48 hours ) (n=3)  
Discontinued intervention (n=0)

## Analysis

Analysed (n=49)  
Excluded from analysis (n=0)

Analysed (n=50)  
Excluded from analysis (n= 0)
